# Supplementary material
Source: PubMed Central journal article supplement (PMC2442710)
Supplement: NIHMS55584-supplement-supplement_1.pdf [file NIHMS55584-supplement-supplement_1.pdf]

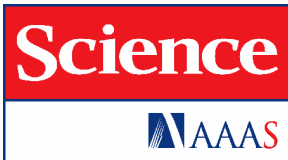

## Supporting Online Material for

### **Chimpanzee Reservoirs of Pandemic and Nonpandemic HIV-1**

Brandon F. Keele, Fran Van Heuverswyn, Yingying Li, Elizabeth Bailes, Jun Takehisa, Mario L. Santiago, Frederic Bibollet-Ruche, Yalu Chen, Louise V. Wain, Florian Liegeois, Severin Loul, Eitel Mpoudi Ngole, Yanga Bienvenue, Eric Delaporte, John F. Y. Brookfield, Paul M. Sharp, George M. Shaw, Martine Peeters, Beatrice H. Hahn\*

\*To whom correspondence should be addressed. E-mail: bhahn@uab.edu

Published 25 May 2006 on *Science Express*  
DOI: 10.1126/science.1126531

#### **This PDF file includes:**

Materials and Methods

Fig. S1

Tables S1 to S4

References

## SUPPORTING ONLINE MATERIAL

### Materials and Methods

*Study sites, sample collection and shipment.* Fecal samples (n=599) were collected from wild-living (non-habituated) ape communities at 10 remote forest sites in southern Cameroon (Fig. 1). Forests were surveyed in the vicinity of base camps by collection teams (usually comprised of one team leader and two local guides) who followed elephant paths or forest transects in search for signs of wild apes (e.g., vocalization, night nests, feeding areas). The EK, CP, BB, and LB sites were located in National Parks or Forest Reserves, while the remaining field sites were in un-protected areas with considerable hunting pressure. Fecal samples were identified to be of likely chimpanzee origin by experienced trackers. For each sample, approximately 20g of feces were placed into a 50 ml tube containing 20 ml of RNAlater (Ambion, Austin, TX). Time, date and collection site were recorded. In addition, samples were inspected to estimate their likely time of deposition. In some instances, global positioning system (GPS) coordinates were obtained. Specimens were kept at base camps at ambient temperature for up to 20 days, and subsequently transported to a central laboratory facility in Yaounde for storage at  $-20^{\circ}\text{C}$ . Samples were shipped to Europe and the US at ambient temperatures, and stored at  $-80^{\circ}\text{C}$  upon receipt.

*Detection of SIVcpz antibodies in RNAlater preserved fecal samples.* Fecal samples were examined for the presence of SIVcpz antibodies using an enhanced chemiluminescent Western immunoblot assay specifically developed for RNAlater preserved specimens. RNAlater is a high salt solution (25 mM Sodium Citrate, 10 mM EDTA, 70 g ammonium sulfate/100 ml solution, pH 5.2) that preserves nucleic acids, but precipitates immunoglobulin and thus generally precludes antibody detection by immunoblot analysis (SI). However, we found that

RNA<sub>later</sub> precipitated immunoglobulin can be resolubilized by diluting fecal/RNA<sub>later</sub> mixtures (1.5 ml) with PBS-Tween-20 (8.5 ml), inactivating the mixture for 1 hr at 60°C, clarifying it by centrifugation (3500 x g for 10 min), and then dialyzing it against PBS overnight at 4°C. The reconstituted extracts were then subjected to immunoblot analysis as reported previously (S2).

*Sensitivity and specificity of fecal antibody detection.* The sensitivity and specificity of the fecal immunoblot assay were determined using test results from wild-living but habituated chimpanzees in Gombe National Park (Tanzania) where SIVcpzP<sub>ts</sub> prevalence rates range from 5 to 30% in different communities (S2, S3). Fecal samples (n=148) were collected from chimpanzees of known infection status and subjected to Western blot analysis. Antibodies were detected in 47 of 51 samples from infected chimpanzees, but in none of 97 samples from uninfected chimpanzees. Using the fraction of positive samples (rather than infected individuals), this yielded a sensitivity of 0.92 with confidence limits of 0.83 - 0.97 (as determined assuming binomial sampling). The specificity of fecal antibody detection was calculated using test results from uninfected chimpanzees and determined to be 1.00 with a lower confidence limit of 0.97. For these calculations, it was assumed that successive test results from the same individual were not correlated.

*Nucleic acid extraction from fecal samples.* Fecal RNA was extracted from RNA<sub>later</sub>-preserved fecal specimens using the RNA<sub>aqueous</sub> Midi-Kit (Ambion, Austin, TX) as described (S2-S4). Fecal DNA was extracted using the QIAamp Stool DNA Mini kit (Qiagen, Valencia, CA). Briefly, 1.5 ml of fecal RNA<sub>later</sub> mixture was resuspended in stool lysis buffer, clarified by centrifugation, reacted with an InhibitEx tablet (Qiagen, Valencia, CA), treated with

proteinase K, and passed through a DNA binding column. Bound DNA was eluted in 50-150 $\mu$ l elution buffer.

*Amplification of SIVcpz sequences from fecal RNA.* Diagnostic reverse transcriptase polymerase chain reaction (RT-PCR) was performed as described, using SIVcpz/HIV-1 consensus primers in *pol* (integrase) and *env* (gp41 ectodomain) regions (S2, S3, S5). cDNA was synthesized using the R1 primer, followed by nested PCR using primers F1/R1 and F2/R2. The *pol* primers included CPZ-pol-F1a (5'-ACCTGGATNCCWGANTGGGA-3'), CPZ-pol-R1a (5'-ACBACYGCNCCTTCHCCTTTC-3'), CPZ-pol-F2a (5'- TWYTATGTWGATGGRGCAGC -3') and CPZ-pol-R2 (5'-CCCAATCCCCCCTTTTCTTTTAAAATT-3'). In some instances, CPZ-pol-F1b (5'- GTTACCTGGGTACCTGAGTGGGA -3'), CPZ-pol-F1c (5'- TGGTGGDCWGANTAYTGGCA-3'), CPZ-pol-R1b (5'- ACTGCHCCYTCWCCTTCCACAG -3'), and CPZ-pol-F2b (5'- ACCTGGATHCCHGANTGGGA-3') were also used. The *env* (gp41 region) primers included CPZ-gp41-F1 (5'-TCTTAGGAGCAGCAGGAAGCACTATGGG-3'), CPZ-gp41-R1 (5'- AACGACAAAGGTGAGTATCCCTGCCTAA-3'), CPZ-gp41-F2 (5'- ACAATTATTGTCTGGTATAGTGCAACAGCA-3') and CPZ-gp41-R2a (5'- TTAAACCTATCAAGCCTCCTACTATCATTA-3'). In some instances, CPZ-gp41-R2b (5'- TCCTACTATCATTATGAATATTTTATATA-3') was also used. RT-PCR products from *pol* (~890 bp; HXB2 coordinates 3887-4775) and gp41 regions (~390 bp; HXB2 sequence 7880-8264) were gel purified (Qiagen, Valencia, CA) and sequenced directly (GenBank accession numbers DQ370366 to DQ370419).

Full-length viral sequences were obtained for four SIVcpz*Ptt* strains (LB7, MB66, EK505 and MT145) using a combination of consensus and virus specific primers as described

previously (S3, S5). A series of overlapping subgenomic fragments (ranging in length from 400 bp – 1,500 bp) was generated and directly sequenced. In regions of fragment overlap, the 5' sequence was arbitrarily chosen. The concatenated full-length SIVcpzPtt sequences were 9,132 bp to 9,281 bp in length (GenBank accession numbers DQ373063 to DQ373066).

*Phylogenetic analyses.* Deduced amino acid sequences of SIVcpz genes (or gene fragments) were aligned with corresponding sequences of representative SIVcpz and HIV-1 strains using CLUSTAL W (S6) (GenBank accession numbers were as follows: HIV-1 M U455, M62320; HIV-1 M HXB2, K03455; HIV-1 N YBF30, AJ006022; HIV-1 N YBF106, AJ271370; HIV-1 O ANT70, L20587; HIV-1 O MVP5180, L20571; SIVcpzGAB1, X52154; SIVcpzGAB2, AF382828; SIVcpzCAM3, AF115393; SIVcpzCAM5, AJ271369; SIVcpzCAM13, AY169968; SIVcpzUS, AF103818; SIVcpzTAN1, AF447763; SIVcpzTAN2, DQ374657; SIVcpzTAN3, DQ374658; and SIVcpzANT, U42720). Sites that could not be aligned unambiguously or sites with a gap in any sequence were excluded. For full-length genome analysis, Gag/Pol and Pol/Vif overlaps were removed from the C-terminus of the deduced Gag and Pol protein sequences, respectively. In addition, the concatenated Pol and Vif alignment was divided into two regions around a previously reported recombination breakpoint between the SIVcpzCAM3/CAM5/US and HIV-1 group N lineages (S7, S8). Trees were inferred by the Bayesian method implemented in MrBayes (S9), using the Jones, Taylor and Thornton model of evolution and gamma distributed rates at sites, with one million generations and burn-in of 10%. Bayesian parameters were examined with the Tracer program (<http://evolve.zoo.ox.ac.uk/software.html?id=tracer>) and all estimated sample sizes were greater than 563.

*Species and subspecies determinations.* For species and subspecies analysis, a 498-bp region of the mtDNA genome (D loop) was amplified from fecal DNA as described (S2). PCR was performed using primers L15997 (5'-CACCATTAGCACCCAAAGCT-3') and H16498 (5'-CCTGAAGTAGGAACCAGATG-3') and amplification products were sequenced directly. Identical sequences were identified by phylogenetic analysis and grouped into unique mtDNA haplotypes. These were classified based on their relatedness to species and subspecies specific reference sequences from GenBank (accession numbers; AF102684, AF102685, AF102687, AF249683, AF249684, AF249685, AF249686, AF249687, AF249688, AF249689, AF290602, AF290604, AF290605, AF290606, AF290607, AF290608, AF290609, AY126684, AY126685, AY126686, AY126687, AY126691, AY126692, AY126693, AY126695, X93335) as well as other collection sites in Ivory Coast (TA), Tanzania (GM), Rwanda (NY), Democratic Republic of Congo (KS), and Republic of Congo (GT) as well as sanctuaries (MG) and primate centers (YK) (GenBank accession numbers: DQ370307 to DQ370365). Sequences were aligned using CLUSTAL W (S6). Sites that could not be aligned unambiguously or sites with a gap in any sequence were excluded. Phylogenetic trees were inferred by the Bayesian method implemented in MrBayes (S9), with the GTR model for gamma distributed rates at sites and 10 million generations with a burn in of 10%. Estimated sample sizes from Tracer (<http://evolve.zoo.ox.ac.uk/software.html?id=tracer>) were greater than 220. This analysis identified 82 new mtDNA haplotypes among the fecal samples from wild chimpanzees in Cameroon (fig. S1). These are listed in table S2 and available at GenBank under accession numbers DQ367532 to DQ367613.

*Microsatellite and gender analyses.* Microsatellite analyses were performed as described (S4). All samples were genotyped at four highly polymorphic loci (D18s536, D4s243, D10s676,

D9s922), with additional loci amplified for select samples (D2s1326, D2s1333, D4s1627, D9s905, D1s548). All PCR reactions were performed in duplicate. Individuals whose genotype appeared homozygous were amplified a minimum of seven times to exclude allelic drop out.

For gender determination, a region of the amelogenin gene was amplified that contains a deletion in the X, but not the Y chromosome (*S10*). Two sets of primers were used (AMEL-F106 5'-CCCTGGGCTCTGTAAAGAATAGTG-3' and AMEL-R106 5'-ATCAGAGCTTAAACTGGGAAGCTG-3' as well as AMEL-F212 5'-ACCTCATCCTGGGCACCCTGG-3' and AMEL-R212 (5'-AGGCTTGAGGCCAACCATCAG-3')). These generated a 106bp or 212 bp fragment from the X chromosome, and a 112bp or 218bp fragment from the Y chromosome, respectively. Amplification products were visualized and sized as the microsatellite amplicons.

*SIVcpz prevalence determination.* For DP, EK, BB, MB and LB sites, *SIVcpz* prevalence rates were estimated based on the proportion of infected individuals as determined by microsatellite analyses (tables S3 and S4). For each chimpanzee, the probability that it would be detected as being infected, if it was truly infected, was calculated, taking into consideration the number of specimens analyzed as well as the test sensitivity (these values varied between populations from 0.9298 and 0.9825, depending on the kind of tests performed for each individual). *SIVcpz* prevalence was then estimated as the proportion of chimpanzees identified as infected, with 95% confidence limits calculated based on binomial sampling (table S1).

Microsatellite data were also used to estimate the extent of sample degradation and oversampling. Of 219 fecal samples collected at the DP, EK, BB, MB and LB sites, only 182 produced a complete (four loci) genotype. The remainder (n=37) yielded only a subset of loci, indicating partial degradation. Thus, on average, a proportion of 37/219ths (=0.169) of all

collected samples were degraded. Moreover, the 182 completely genotyped samples were derived from 106 individual chimpanzees. Thus, on average, each chimpanzee was sampled  $182/106 = 1.716$  times. Finally, of the 106 fully genotyped chimpanzees, 66 were sampled once and 40 more than once. Given that the probability of a positive test for an infected chimpanzee sampled once is 0.92 and that of a chimpanzee sampled twice is  $(1 - 0.08^2 = 0.9936)$ , the probability that a positive chimpanzee was detected as infected was  $(66 \times 0.92 + 40 \times 0.9936)/106 = 0.9478$ . For fecal samples not tested by microsatellite analyses, we thus estimated the number of individuals that were sampled as  $106n/219$  (where  $n$  is the number of samples collected), and for each chimpanzee included among the individuals yielding non-degraded samples, we estimated a 0.9478 chance of its being detected as positive if it was positive. From this, we calculated the prevalence rates and their confidence limits for the populations at the WE, MT, BQ, DG and CP sites (table S1).



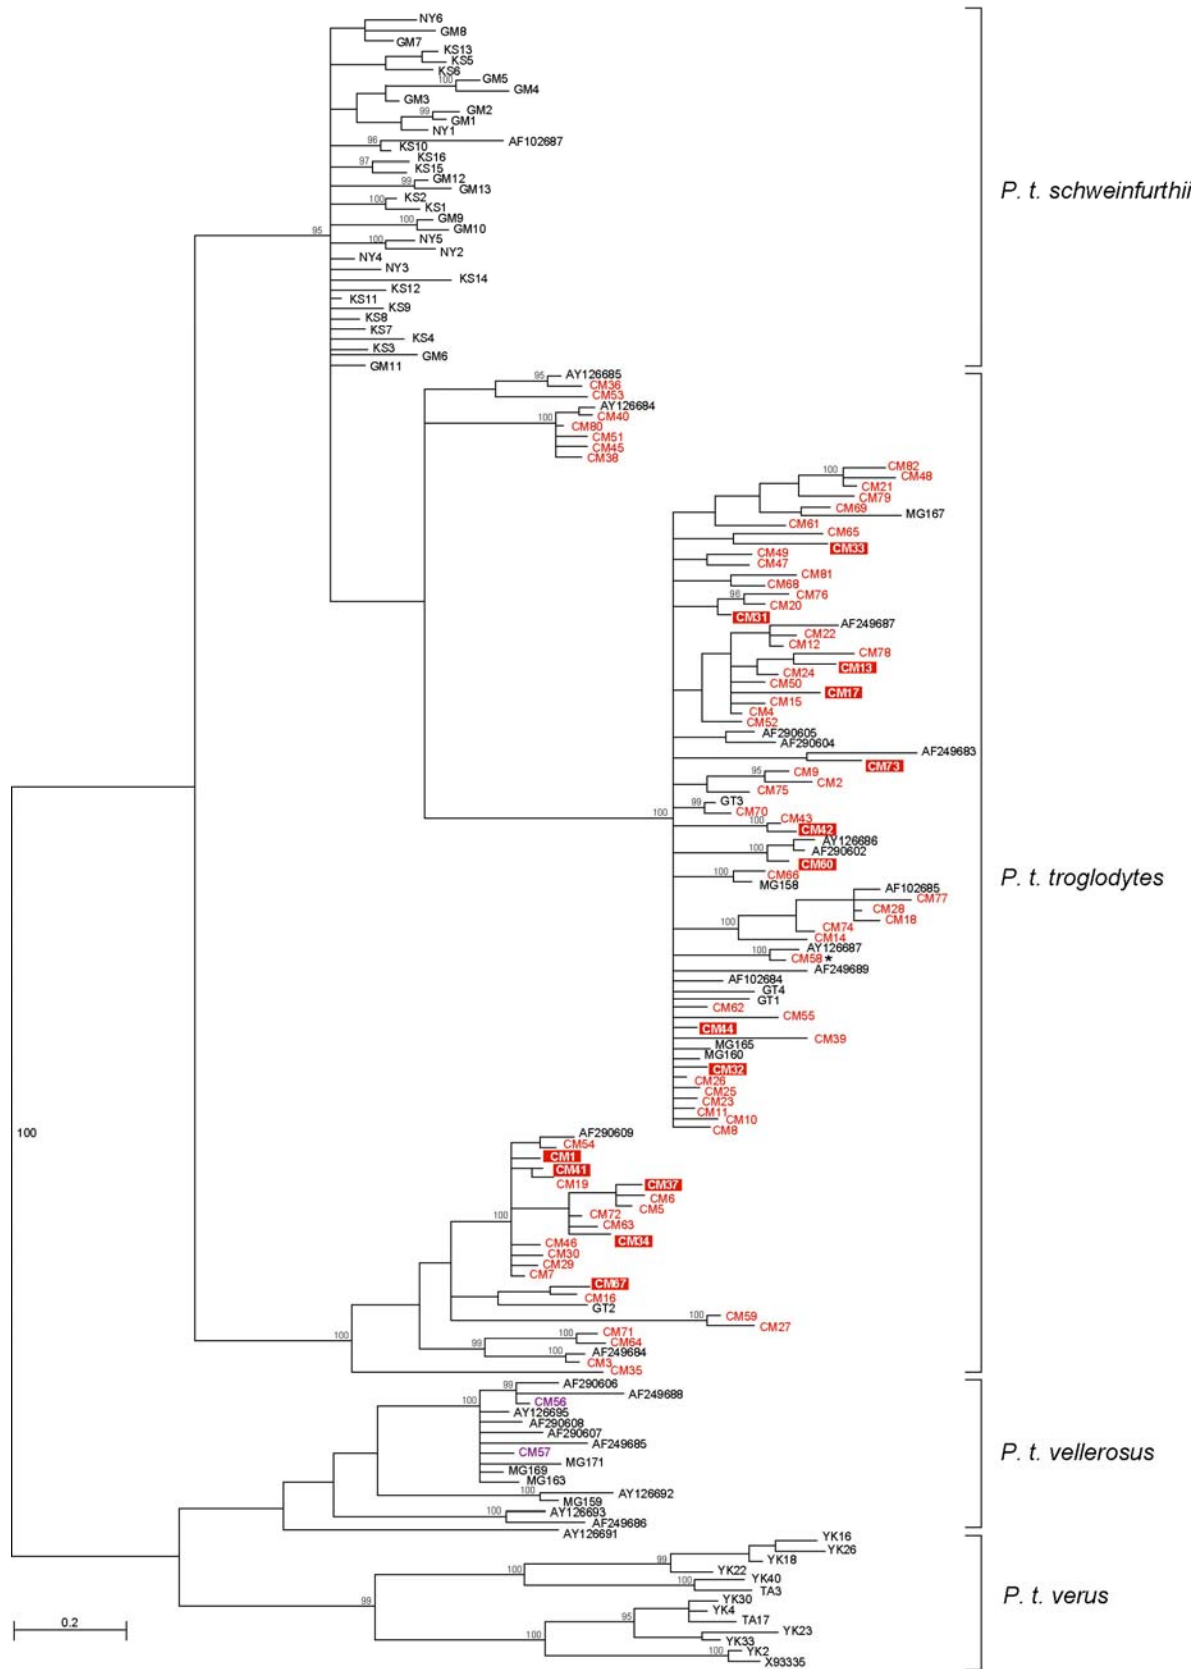

fig. S1

**Fig. S1.** Subspecies origin of chimpanzee fecal samples. Mitochondrial DNA sequences (a 498 bp D loop fragment) from 446 chimpanzee fecal specimens were grouped into unique mtDNA haplotypes (listed in table S2) and then compared to subspecies specific reference sequences by phylogenetic tree analysis (indicated by brackets). The tree was constructed by the Bayesian method (S9), using the GTR model with gamma distributed rates at sites and 10 million generations with a burn in of 10%. Haplotypes from *P. t. troglodytes* are shown in red and those from *P. t. vellerosus* in magenta. An asterisk denotes the haplotype of a *P. t. troglodytes* sample (CM58) that was identified in the range of *P. t. vellerosus* apes north of the Sanaga River. Haplotypes from SIVcpz infected *P. t. troglodytes* apes are boxed. The numbers on nodes are percentage posterior probabilities (only values above 95% are shown). The scale bars represents 0.2 substitutions per site.

**Table S1.** Prevalence of SIVcpz infection in ten wild-living chimpanzee communities.

| Collection Sites <sup>1</sup> | Fecal samples collected | Samples positive for |         | <i>P.t.</i> |                   | Samples containing SIVcpz antibodies | Samples with complete microsatellite genotypes <sup>2</sup> | Number of chimpanzees tested | Number of chimpanzees infected | SIVcpz prevalence (95% CI) <sup>4</sup> |                       |
|-------------------------------|-------------------------|----------------------|---------|-------------|-------------------|--------------------------------------|-------------------------------------------------------------|------------------------------|--------------------------------|-----------------------------------------|-----------------------|
|                               |                         | mtDNA                | Gorilla | Chimpanzee  | <i>vellerosus</i> |                                      |                                                             |                              |                                |                                         | <i>troglodytes</i>    |
| WE                            | 27                      | 26                   | 1       | 25          | 23                | 2                                    | 0                                                           | nd <sup>3</sup>              | nd                             | 0                                       | 0.0% (0.0% - 23.1%)   |
| MT                            | 94                      | 81                   | 0       | 81          | 0                 | 81                                   | 10                                                          | nd                           | nd                             | 2                                       | 5.4% (1.0% - 16.0%)   |
| DG                            | 71                      | 54                   | 25      | 29          | 0                 | 29                                   | 0                                                           | nd                           | nd                             | 0                                       | 0.0% (0.0% - 20.3%)   |
| DP                            | 139                     | 125                  | 0       | 125         | 0                 | 125                                  | 7                                                           | 100                          | 46                             | 2                                       | 4.4% (0.8% - 13.3%)   |
| BQ                            | 101                     | 88                   | 6       | 82          | 0                 | 82                                   | 0                                                           | nd                           | nd                             | 0                                       | 0.0% (0.0% - 7.4%)    |
| EK                            | 26                      | 25                   | 6       | 19          | 0                 | 19                                   | 6                                                           | 18                           | 15                             | 4                                       | 28.7% (10.4% - 54.9%) |
| BB                            | 39                      | 38                   | 4       | 34          | 0                 | 34                                   | 0                                                           | 25                           | 18                             | 0                                       | 0.0% (0.0% - 16.4%)   |
| MB                            | 37                      | 25                   | 0       | 25          | 0                 | 25                                   | 9                                                           | 25                           | 18                             | 6                                       | 35.3% (16.5% - 58.7%) |
| LB                            | 54                      | 40                   | 24      | 16          | 0                 | 16                                   | 2                                                           | 14                           | 9                              | 2                                       | 23.3% (4.3% - 57.7%)  |
| CP                            | 11                      | 11                   | 1       | 10          | 0                 | 10                                   | 0                                                           | nd                           | nd                             | 0                                       | 0.0% (0.0% - 48.7%)   |
| Total                         | 599                     | 513                  | 67      | 446         | 23                | 423                                  | 34                                                          | 182                          | 106                            | 16                                      |                       |

<sup>1</sup>Location of field sites is shown in Fig. 1.

<sup>2</sup>Individual genotypes are shown in tables S3 and S4.

<sup>3</sup>nd, not done.

<sup>4</sup>CI, Confidence Interval.

**Table S2.** Subspecies origin of chimpanzee fecal samples.

| Haplotype <sup>1</sup> | Fecal samples with identical mtDNA haplotype                                                                                                                                                     | GenBank accession number |
|------------------------|--------------------------------------------------------------------------------------------------------------------------------------------------------------------------------------------------|--------------------------|
| CM1                    | BQ28, BQ33, BQ50, MT150, MT330, BQ497, BQ499, DP03, DP17, DP18, DP19, DP22, DP23, DP26, DP27, DP67, DP69, DP80, DP82, DP130, DP134, DP163, DP206, DP218, DP220                                   | DQ367534                 |
| CM2                    | BQ29                                                                                                                                                                                             | DQ367535                 |
| CM3                    | BQ30                                                                                                                                                                                             | DQ367536                 |
| CM4                    | BQ32, BQ44, MT122, MT123, MT125, MT153, MT156, MT157, BQ193, BB241, MT335, MT371, MT373, MT436, MT437, EK504, EK508, EK509, DP01, DP05, DP103, DP104, DP137, DP151, DP159, DP162,                | DQ367537                 |
| CM5                    | BQ38, BQ389, BQ391, BQ392, MB135, LB188, EK503, EK517, DG533, DG541, DP98                                                                                                                        | DQ367538                 |
| CM6                    | BQ39, BQ42, BQ52, BQ55, BQ474, BQ481, BQ484, BQ487                                                                                                                                               | DQ367539                 |
| CM7                    | BQ40, BQ41, MT326, MT337, MT339, DG407, CP384, EK513, EK522                                                                                                                                      | DQ367540                 |
| CM8                    | BQ43, BQ51, BQ83, BQ84, BQ387, BQ388, BQ393, MT334, DP14, DP83, DP89, DP90, DP91, DP92, DP94, DP99, DP100, DP101, DP110, DP140, DP142, DP219                                                     | DQ367541                 |
| CM9                    | BQ45, BQ47, MT121, MB140, MT141, LB310, MT348, MT357, MT365, MT385, BQ390, BQ396, BQ397, BQ398, BQ400, BQ401, BQ402, BQ403, BQ473, BQ475, BQ482, BQ489, BQ494, BQ495, BQ496, BQ498, BQ500, DG524 | DQ367542                 |
| CM10                   | BQ46, BQ194, BQ195, BQ490                                                                                                                                                                        | DQ367543                 |
| CM11                   | BQ48, BQ57, BQ394, BQ476, BQ483, BQ488, BQ488b, BQ491                                                                                                                                            | DQ367544                 |
| CM12                   | BQ49, MB97, DP70                                                                                                                                                                                 | DQ367545                 |
| CM13                   | BQ54, MB23, MB24, LB307, LB308, BQ399, DG546, DP71, DP72, DP74, DP75                                                                                                                             | DQ367546                 |
| CM14                   | BQ56, BQ59, BQ471, BQ477, BQ478, BQ479, BQ480, BQ485                                                                                                                                             | DQ367547                 |
| CM15                   | MT51, MT52, MT126                                                                                                                                                                                | DQ367548                 |
| CM16                   | MT53, MT54, MT120, MT124, MT154, MT155, MT343, MT344, MT345, MT346, MT347, MT349, MT350, MT351, MT353, MT354, MT355, MT356, MT358, MT360, MT361, MT362, MT363, MT366, MT386                      | DQ367549                 |
| CM17                   | MB66                                                                                                                                                                                             | DQ367550                 |
| CM18                   | BB72, BB75, BB79, BB92, BB104                                                                                                                                                                    | DQ367551                 |
| CM19                   | BB73, BB74, BB87, BB94, BB102, BB230, DG526, DG542, DG543                                                                                                                                        | DQ367552                 |
| CM20                   | BB76, BB239, EK501                                                                                                                                                                               | DQ367553                 |
| CM21                   | BB77                                                                                                                                                                                             | DQ367554                 |
| CM22                   | BB78, BB90, BB101, BB103, MT342                                                                                                                                                                  | DQ367555                 |
| CM23                   | BQ81, MT127, LB204, LB205, LB208, MT329, MT331, MT332, MT333, MT336, MT340, DG531, DG547, DG548, DG549, DG562, DP62, DP65                                                                        | DQ367556                 |
| CM24                   | BQ82, EK521, DP63, DP64, DP68, DP86, DP117, DP118, DP127, DP128, DP131, DP132,                                                                                                                   | DQ367557                 |
| CM25                   | BQ85, BQ86                                                                                                                                                                                       | DQ367558                 |
| CM26                   | BB88, BB95                                                                                                                                                                                       | DQ367559                 |
| CM27                   | BB89, BB237, BB240                                                                                                                                                                               | DQ367560                 |
| CM28                   | BB91, BB99, BB100, LB174, LB175                                                                                                                                                                  | DQ367561                 |
| CM29                   | BB93, BB229, BB234, BB238                                                                                                                                                                        | DQ367562                 |
| CM30                   | BB106                                                                                                                                                                                            | DQ367563                 |
| CM31                   | MT114, MT115, MT116, MT117, MT148                                                                                                                                                                | DQ367564                 |
| CM32                   | MT119, MT151, EK516                                                                                                                                                                              | DQ367565                 |
| CM33                   | MB138, MB139, MB189, MB191, MB192, MB250, LB311, LB312, LB313, MB318, MB319, MB320                                                                                                               | DQ367566                 |
| CM34                   | MT142, MT143, MT145, MT147, MT149, LB176, MB324                                                                                                                                                  | DQ367567                 |
| CM35                   | MT144, DP125, DP129, DP133, DP135                                                                                                                                                                | DQ367568                 |
| CM36                   | MT146                                                                                                                                                                                            | DQ367569                 |
| CM37                   | LB186                                                                                                                                                                                            | DQ367570                 |
| CM38                   | MB190, LB309                                                                                                                                                                                     | DQ367571                 |
| CM39                   | BB235                                                                                                                                                                                            | DQ367572                 |
| CM40                   | BB236                                                                                                                                                                                            | DQ367573                 |
| CM41                   | MB245                                                                                                                                                                                            | DQ367574                 |
| CM42                   | MB246, MB247, MB248, EK511                                                                                                                                                                       | DQ367575                 |
| CM43                   | MB315, MB316                                                                                                                                                                                     | DQ367576                 |
| CM44                   | MB317                                                                                                                                                                                            | DQ367577                 |
| CM45                   | MB323                                                                                                                                                                                            | DQ367578                 |
| CM46                   | MT325, MT338, DG525, DG527, DG530, DG532, DG534, DG535                                                                                                                                           | DQ367579                 |
| CM47                   | MT327                                                                                                                                                                                            | DQ367580                 |
| CM48                   | MT341                                                                                                                                                                                            | DQ367581                 |
| CM49                   | MT352, MT359, MT364                                                                                                                                                                              | DQ367582                 |
| CM50                   | MT379                                                                                                                                                                                            | DQ367583                 |

**Table S2.** Subspecies origin of chimpanzee fecal samples (continued).

| Haplotype <sup>1</sup> | Fecal samples with identical mtDNA haplotype                                                                                                      | GenBank accession number |
|------------------------|---------------------------------------------------------------------------------------------------------------------------------------------------|--------------------------|
| CM51                   | CP380, CP381, CP382                                                                                                                               | DQ367584                 |
| CM52                   | CP383                                                                                                                                             | DQ367585                 |
| CM53                   | BQ395, BQ404, BQ492, BQ493                                                                                                                        | DQ367586                 |
| CM54                   | DG405, DP78, DP79, DP88, DP111, DP112, DP113, DP114, DP115, DP116, DP119                                                                          | DQ367587                 |
| CM55                   | DG406                                                                                                                                             | DQ367588                 |
| CM56                   | WE438, WE439, WE440, WE441, WE443, WE444, WE445, WE446, WE447, WE448, WE449, WE450, WE451, WE454, WE456, WE457, WE458, WE459, WE460, WE461, WE462 | DQ367532                 |
| CM57                   | WE452, WE453                                                                                                                                      | DQ367533                 |
| CM58                   | WE455, WE464                                                                                                                                      | DQ367589                 |
| CM59                   | CP466                                                                                                                                             | DQ367590                 |
| CM60                   | CP467, EK502, EK505, EK506, EK507                                                                                                                 | DQ367591                 |
| CM61                   | CP468, EK510                                                                                                                                      | DQ367592                 |
| CM62                   | CP469                                                                                                                                             | DQ367593                 |
| CM63                   | CP470                                                                                                                                             | DQ367594                 |
| CM64                   | BQ472, DG523, DG529, DG536, DG537, DG538                                                                                                          | DQ367595                 |
| CM65                   | EK512                                                                                                                                             | DQ367596                 |
| CM66                   | EK518                                                                                                                                             | DQ367597                 |
| CM67                   | EK519                                                                                                                                             | DQ367598                 |
| CM68                   | DG528, DG539                                                                                                                                      | DQ367599                 |
| CM69                   | DG540                                                                                                                                             | DQ367600                 |
| CM70                   | DP04                                                                                                                                              | DQ367601                 |
| CM71                   | DP06, DP13, DP102, DP120                                                                                                                          | DQ367602                 |
| CM72                   | DP07, DP08, DP12, DP16                                                                                                                            | DQ367603                 |
| CM73                   | DP09, DP10, DP11, DP15, DP20, DP24, DP25, DP108, DP109, DP126                                                                                     | DQ367604                 |
| CM74                   | DP66, DP154, DP156                                                                                                                                | DQ367605                 |
| CM75                   | DP77, DP95, DP97                                                                                                                                  | DQ367606                 |
| CM76                   | DP81, DP85, DP121, DP122, DP124                                                                                                                   | DQ367607                 |
| CM77                   | DP93, DP96                                                                                                                                        | DQ367608                 |
| CM78                   | DP105, DP106, DP107, DP123, DP160                                                                                                                 | DQ367609                 |
| CM79                   | DP136, DP141, DP143, DP144, DP145, DP146, DP148, DP149, DP150                                                                                     | DQ367610                 |
| CM80                   | DP152, DP153, DP164, DP165                                                                                                                        | DQ367611                 |
| CM81                   | DP155, DP157, DP158                                                                                                                               | DQ367612                 |
| CM82                   | LB7                                                                                                                                               | DQ367613                 |

<sup>1</sup>Haplotypes correspond to those shown in fig. S1. CM56 and CM57 represent *P. t. vellerosus* apes; all other haplotypes are from members of the *P. t. troglodytes* subspecies. CM58 denotes the haplotype of a *P. t. troglodytes* sample that was collected in the range of the *P. t. vellerosus* subspecies north of the Sanaga River. Haplotypes from SIVcpz infected chimpanzees are highlighted in red.

**Table S3.** Genetic identification of SIVcpz infected chimpanzees at five field sites.

| Individual | Fecal sample | Date of sample collection | Fecal                              |                       | Fecal virion               |                              | Sex <sup>4</sup> | Locus <sup>5</sup><br>D18S536 | Locus <sup>5</sup><br>D4S243 | Locus <sup>5</sup><br>D10S676 | Locus <sup>5</sup><br>D9S922 |
|------------|--------------|---------------------------|------------------------------------|-----------------------|----------------------------|------------------------------|------------------|-------------------------------|------------------------------|-------------------------------|------------------------------|
|            |              |                           | Western Blot Analysis <sup>1</sup> | Analysis <sup>1</sup> | RNA Detection <sup>2</sup> | mtDNA haplotype <sup>3</sup> |                  |                               |                              |                               |                              |
| ID1        | MT114        | 08/06/03                  | Pos                                | pol                   | nd                         | CM31                         | M                | 145/161                       | 187/199                      | 177/177                       | 293/297                      |
|            | MT115        | 08/06/03                  | Pos                                | pol                   | gp41                       | CM31                         | M                | 145/161                       | 187/199                      | 177/177                       | 293/297                      |
|            | MT116        | 08/06/03                  | Pos                                | nd <sup>6</sup>       | nd                         | CM31                         | M                | 145/161                       | 187/199                      | 177/177                       | 293/297                      |
|            | MT117        | 08/06/03                  | Pos                                | pol                   | gp41                       | CM31                         | M                | 145/161                       | 187/199                      | 177/177                       | 293/297                      |
|            | MT148        | 08/14/03                  | Pos                                | pol                   | gp41                       | CM31                         | M                | 145/161                       | 187/199                      | 177/177                       | 293/297                      |
| ID2        | MT142        | 08/14/03                  | Pos                                | pol                   | nd                         | CM34                         | M                | 161/169                       | 195/227                      | 181/181                       | 289/309                      |
|            | MT143        | 08/14/03                  | Pos                                | pol                   | gp41                       | CM34                         | M                | 161/169                       | 195/227                      | 181/181                       | 289/309                      |
|            | MT145        | 08/14/03                  | Pos                                | pol                   | gp41                       | CM34                         | M                | 161/169                       | 195/227                      | 181/181                       | 289/309                      |
|            | MT147        | 08/14/03                  | Pos                                | pol                   | gp41                       | CM34                         | M                | 161/169                       | 195/227                      | 181/181                       | 289/309                      |
|            | MT149        | 08/14/03                  | Pos                                | pol                   | gp41                       | CM34                         | M                | 161/169                       | 195/227                      | 181/181                       | 289/309                      |
| ID3        | DP22         | 03/6/03                   | Pos                                | nd                    | gp41                       | CM1                          | F                | 141/169                       | 187/231                      | 169/185                       | 301/305                      |
|            | DP23         | 03/6/03                   | Pos                                | nd                    | gp41                       | CM1                          | F                | 141/169                       | 187/231                      | 169/185                       | 301/305                      |
|            | DP26         | 03/6/03                   | Pos                                | nd                    | nd                         | CM1                          | F                | 141/169                       | 187/231                      | 169/185                       | 301/305                      |
|            | DP206        | 03/6/03                   | Pos                                | pol                   | gp41                       | CM1                          | F                | 141/169                       | 187/231                      | 169/185                       | 301/305                      |
|            | DP27         | 03/6/03                   | Pos                                | nd                    | nd                         | CM1                          | F                | 141/169                       | 187/231                      | 169/185                       | 301/305                      |
|            | DP80         | 03/6/03                   | Pos                                | nd                    | gp41                       | CM1                          | F                | 141/169                       | 187/231                      | 169/185                       | 301/305                      |
| ID4        | DP24         | 03/6/03                   | Neg <sup>6</sup>                   | pol                   | gp41                       | CM73                         | F                | 141/157                       | 203/223                      | 181/181                       | 273/273                      |
|            | DP25         | 03/6/03                   | Neg <sup>6</sup>                   | pol                   | gp41                       | CM73                         | F                | 141/157                       | 203/223                      | 181/181                       | 273/273                      |
|            | DP109        | 08/17/03                  | Pos                                | pol                   | gp41                       | CM73                         | F                | 141/157                       | 203/223                      | 181/181                       | 273/273                      |
| ID5        | EK505        | 07/11/04                  | Pos                                | pol                   | gp41                       | CM60                         | M                | 153/173                       | 223/227                      | 177/181                       | 297/301                      |
| ID6        | EK502        | 07/11/04                  | Pos                                | pol                   | gp41                       | CM60                         | M                | 153/161                       | 195/223                      | 177/189                       | 297/305                      |
|            | EK506        | 07/11/04                  | Pos                                | pol                   | nd                         | CM60                         | M                | 153/161                       | 195/223                      | 177/189                       | 297/305                      |
|            | EK507        | 07/11/04                  | Pos                                | pol                   | nd                         | CM60                         | M                | 153/161                       | 195/223                      | 177/189                       | 297/305                      |
| ID7        | EK516        | 08/10/04                  | Pos                                | nd                    | gp41                       | CM32                         | M                | 153/157                       | 223/227                      | 169/177                       | 301/305                      |
| ID8        | EK519        | 08/12/04                  | Pos                                | pol                   | gp41                       | CM67                         | F                | 149/169                       | 227/227                      | 177/185                       | 293/301                      |
| ID9        | MB66         | 06/12/03                  | Pos                                | pol                   | gp41                       | CM17                         | F                | 141/177                       | 191/203                      | 177/185                       | 289/301                      |
| ID10       | MB23         | 10/22/03                  | Pos                                | pol                   | gp41                       | CM13                         | F                | 149/153                       | 247/247                      | 177/189                       | 293/301                      |
|            | MB124        | 10/22/03                  | Pos                                | pol                   | gp41                       | CM13                         | F                | 149/153                       | 247/247                      | 177/189                       | 293/301                      |
| ID11       | MB189        | 03/10/03                  | Pos                                | nd                    | gp41                       | CM33                         | M                | 157/169                       | 227/227                      | 177/177                       | 297/301                      |
|            | MB191        | 03/10/03                  | Pos                                | nd                    | gp41                       | CM33                         | M                | 157/169                       | 227/227                      | 177/177                       | 297/301                      |
|            | MB192        | 03/10/03                  | Pos                                | pol                   | gp41                       | CM33                         | M                | 157/169                       | 227/227                      | 177/177                       | 297/301                      |
| ID12       | MB317        | 12/11/03                  | Pos                                | pol                   | gp41                       | CM44                         | F                | 165/173                       | 223/227                      | 181/185                       | 297/305                      |
| ID13       | MB245        | 04/18/03                  | Pos                                | pol                   | gp41                       | CM41                         | F                | 157/161                       | 199/227                      | 165/177                       | 305/305                      |
| ID14       | MB248        | 04/18/03                  | Pos                                | nd                    | gp41                       | CM42                         | F                | 145/149                       | 191/203                      | 165/165                       | 289/293                      |
| ID15       | LB186        | 03/07/03                  | Pos                                | pol                   | nd                         | CM37                         | M                | 153/173                       | 191/223                      | 177/189                       | 289/297                      |
| ID16       | LB7          | ~09/02                    | Pos                                | pol                   | gp41                       | CM82                         | F                | 161/173                       | 227/231                      | 185/189                       | 297/301                      |

<sup>1</sup>Western blot profiles are shown in Fig. 2.

<sup>2</sup>*pol* sequences recovered from samples MT148 and EK507 were 830 bp and 477 bp in length, respectively; all other *pol* fragments were 889 bp in length.

<sup>3</sup>As shown in fig. S1 and table S2.

<sup>4</sup>M, male; F, female.

<sup>5</sup>Microsatellite loci were amplified from fecal DNA; two alleles per locus are shown; homozygous loci were amplified a minimum of seven times to exclude allelic dropout.

<sup>6</sup>nd, not done.

<sup>6</sup>Microsatellite analysis identified two antibody negative (DP24 and DP25) and one antibody positive fecal sample (DP109) to share an identical genotype, indicating that they were derived from the same SIVcpz infected chimpanzee (ID4). This ape's fecal antibody levels were thus either below the limits of detection at the time of the first analysis, or she experienced acute SIVcpz infection and seroconverted in the interim between the first and last specimen collection.

**Table S4.** Genetic identification of uninfected chimpanzees at five field sites.

| Individual | Fecal Sample <sup>1</sup> | Date     | mtDNA haplotype <sup>2</sup> | Gender <sup>3</sup> | Locus <sup>4</sup> |        | Locus <sup>4</sup> |        | Locus <sup>4</sup> |     | Locus <sup>4</sup> |     |
|------------|---------------------------|----------|------------------------------|---------------------|--------------------|--------|--------------------|--------|--------------------|-----|--------------------|-----|
|            |                           |          |                              |                     | D18S536            | D4S243 | D10S676            | D9S922 |                    |     |                    |     |
| ID17       | DP69                      | 04/12/03 | CM1                          | F                   | 141                | 173    | 199                | 203    | 181                | 193 | 297                | 301 |
| ID18       | DP3                       | 02/15/03 | CM1                          | M                   | 157                | 169    | 227                | 247    | 185                | 185 | 301                | 305 |
|            | DP82                      | 03/01/03 | CM1                          | M                   | 157                | 169    | 227                | 247    | 185                | 185 | 301                | 305 |
|            | DP130                     | 11/07/03 | CM1                          | M                   | 157                | 169    | 227                | 247    | 185                | 185 | 301                | 305 |
|            | DP134                     | 11/07/03 | CM1                          | M                   | 157                | 169    | 227                | 247    | 185                | 185 | 301                | 305 |
|            | DP163                     | 11/17/03 | CM1                          | M                   | 157                | 169    | 227                | 247    | 185                | 185 | 301                | 305 |
| ID19       | DP67                      | 04/12/03 | CM1                          | M                   | 173                | 177    | 227                | 235    | 177                | 181 | 297                | 297 |
|            | DP218                     | 04/12/03 | CM1                          | M                   | 173                | 177    | 227                | 235    | 177                | 181 | 297                | 297 |
| ID20       | DP18                      | 02/19/03 | CM1                          | M                   | 161                | 169    | 227                | 231    | 169                | 169 | 301                | 305 |
| ID21       | DP5                       | 02/17/03 | CM4                          | M                   | 153                | 161    | 191                | 195    | 181                | 185 | 297                | 297 |
| ID22       | DP103                     | 08/15/03 | CM4                          | M                   | 153                | 169    | 187                | 195    | 181                | 185 | 293                | 297 |
|            | DP104                     | 08/15/03 | CM4                          | M                   | 153                | 169    | 187                | 195    | 181                | 185 | 293                | 297 |
|            | DP151                     | 11/13/03 | CM4                          | M                   | 153                | 169    | 187                | 195    | 181                | 185 | 293                | 297 |
|            | DP159                     | 11/17/03 | CM4                          | M                   | 153                | 169    | 187                | 195    | 181                | 185 | 293                | 297 |
|            | DP162                     | 11/17/03 | CM4                          | M                   | 153                | 169    | 187                | 195    | 181                | 185 | 293                | 297 |
| ID23       | DP098                     | 07/29/03 | CM5                          | F                   | 137                | 149    | 187                | 199    | 177                | 177 | 305                | 309 |
| ID24       | DP89                      | 07/26/03 | CM8                          | F                   | 161                | 177    | 203                | 235    | 177                | 185 | 289                | 297 |
|            | DP090                     | 07/26/03 | CM8                          | F                   | 161                | 177    | 203                | 235    | 177                | 185 | 289                | 297 |
| ID25       | DP091                     | 07/26/03 | CM8                          | M                   | 137                | 177    | 203                | 223    | 169                | 177 | 289                | 297 |
|            | DP092                     | 07/26/03 | CM8                          | M                   | 137                | 177    | 203                | 223    | 169                | 177 | 289                | 297 |
|            | DP110                     | 08/19/03 | CM8                          | M                   | 137                | 177    | 203                | 223    | 169                | 177 | 289                | 297 |
| ID26       | DP142                     | 11/11/03 | CM8                          | M                   | 141                | 145    | 227                | 231    | 181                | 181 | 297                | 301 |
| ID27       | DP140                     | 11/11/03 | CM8                          | F                   | 145                | 169    | 231                | 235    | 181                | 185 | 301                | 305 |
| ID28       | DP14                      | 02/18/03 | CM8                          | M                   | 149                | 177    | 227                | 235    | 185                | 189 | 289                | 297 |
|            | DP099                     | 08/14/03 | CM8                          | M                   | 149                | 177    | 227                | 235    | 185                | 189 | 289                | 297 |
|            | DP100                     | 08/14/03 | CM8                          | M                   | 149                | 177    | 227                | 235    | 185                | 189 | 289                | 297 |
|            | DP101                     | 08/14/03 | CM8                          | M                   | 149                | 177    | 227                | 235    | 185                | 189 | 289                | 297 |
| ID29       | DP094                     | 07/29/03 | CM8                          | F                   | 157                | 165    | 227                | 235    | 181                | 189 | 293                | 305 |
| ID30       | DP70                      | 04/03/03 | CM12                         | F                   | 149                | 153    | 223                | 227    | 177                | 189 | 289                | 289 |
| ID31       | DP75                      | 04/03/03 | CM13                         | F                   | 145                | 157    | 223                | 227    | 177                | 185 | 289                | 289 |
| ID32       | DP71                      | 04/03/03 | CM13                         | F                   | 157                | 173    | 223                | 227    | 177                | 181 | 289                | 289 |
|            | DP72                      | 04/03/03 | CM13                         | F                   | 157                | 173    | 223                | 227    | 177                | 181 | 289                | 289 |
|            | DP74                      | 04/03/03 | CM13                         | F                   | 157                | 173    | 223                | 227    | 177                | 181 | 289                | 289 |
| ID33       | DP64                      | 04/12/03 | CM24                         | F                   | 141                | 149    | 199                | 227    | 177                | 177 | 293                | 297 |
|            | DP86                      | 04/12/03 | CM24                         | F                   | 141                | 149    | 199                | 227    | 177                | 177 | 293                | 297 |
| ID34       | DP63                      | 04/12/03 | CM24                         | M                   | 157                | 161    | 187                | 195    | 173                | 185 | 297                | 297 |
| ID35       | DP127                     | 11/07/03 | CM24                         | F                   | 161                | 173    | 195                | 223    | 181                | 185 | 297                | 301 |
|            | DP132                     | 11/07/03 | CM24                         | F                   | 161                | 173    | 195                | 223    | 181                | 185 | 297                | 301 |
| ID36       | DP68                      | 04/12/03 | CM24                         | F                   | 141                | 157    | 195                | 199    | 177                | 177 | 297                | 301 |
| ID37       | DP65                      | 04/12/03 | CM23                         | F                   | 141                | 177    | 227                | 235    | 177                | 181 | 297                | 301 |
| ID38       | DP129                     | 11/07/03 | CM35                         | F                   | 141                | 173    | 231                | 251    | 177                | 177 | 297                | 313 |
|            | DP133                     | 11/07/03 | CM35                         | F                   | 141                | 173    | 231                | 251    | 177                | 177 | 297                | 313 |
| ID39       | DP154                     | 11/14/03 | CM74                         | F                   | 165                | 169    | 227                | 243    | 169                | 181 | 305                | 305 |
|            | DP156                     | 11/14/03 | CM74                         | F                   | 165                | 169    | 227                | 243    | 169                | 181 | 305                | 305 |
| ID40       | DP79                      | 03/06/03 | CM54                         | F                   | 149                | 153    | 195                | 227    | 169                | 177 | 281                | 281 |
| ID41       | DP88                      | 07/17/03 | CM54                         | F                   | 161                | 169    | 187                | 227    | 177                | 181 | 301                | 313 |
| ID42       | DP112                     | 11/04/03 | CM54                         | M                   | 161                | 169    | 223                | 227    | 169                | 181 | 313                | 317 |
|            | DP113                     | 11/04/03 | CM54                         | M                   | 161                | 169    | 223                | 227    | 169                | 181 | 313                | 317 |
|            | DP114                     | 11/04/03 | CM54                         | M                   | 161                | 169    | 223                | 227    | 169                | 181 | 313                | 317 |
|            | DP115                     | 11/04/03 | CM54                         | M                   | 161                | 169    | 223                | 227    | 169                | 181 | 313                | 317 |
| ID43       | DP124                     | 11/06/03 | CM76                         | F                   | 157                | 161    | 191                | 223    | 185                | 189 | 285                | 289 |
| ID44       | DP121                     | 11/05/03 | CM76                         | F                   | 157                | 165    | 231                | 235    | 169                | 185 | 297                | 301 |
|            | DP122                     | 11/05/03 | CM76                         | F                   | 157                | 165    | 231                | 235    | 169                | 185 | 297                | 301 |
| ID45       | DP81                      | 03/06/03 | CM76                         | M                   | 157                | 169    | 231                | 235    | 165                | 169 | 293                | 297 |
| ID46       | DP105                     | 08/15/03 | CM78                         | F                   | 157                | 161    | 227                | 231    | 177                | 185 | 289                | 301 |
|            | DP106                     | 08/15/03 | CM78                         | F                   | 157                | 161    | 227                | 231    | 177                | 185 | 289                | 301 |
|            | DP107                     | 08/15/03 | CM78                         | F                   | 157                | 161    | 227                | 231    | 177                | 185 | 289                | 301 |
|            | DP160                     | 11/17/03 | CM78                         | F                   | 157                | 161    | 227                | 231    | 177                | 185 | 289                | 301 |
| ID47       | DP4                       | 02/17/03 | CM70                         | F                   | 153                | 173    | 187                | 231    | 185                | 185 | 277                | 297 |
| ID48       | DP6                       | 02/18/03 | CM71                         | F                   | 149                | 153    | 195                | 227    | 169                | 177 | 289                | 305 |
|            | DP13                      | 02/18/03 | CM71                         | F                   | 149                | 153    | 195                | 227    | 169                | 177 | 289                | 305 |
|            | DP102                     | 08/14/03 | CM71                         | F                   | 149                | 153    | 195                | 227    | 169                | 177 | 289                | 305 |
| ID49       | DP12                      | 02/18/03 | CM72                         | F                   | 161                | 173    | 227                | 255    | 185                | 189 | 289                | 289 |
| ID50       | DP7                       | 02/18/03 | CM72                         | F                   | 169                | 173    | 227                | 231    | 185                | 185 | 289                | 309 |
|            | DP8                       | 02/18/03 | CM72                         | F                   | 169                | 173    | 227                | 231    | 185                | 185 | 289                | 309 |
|            | DP16                      | 02/18/03 | CM72                         | F                   | 169                | 173    | 227                | 231    | 185                | 185 | 289                | 309 |
| ID51       | DP9                       | 02/18/03 | CM73                         | F                   | 157                | 161    | 231                | 255    | 181                | 189 | 273                | 313 |
|            | DP10                      | 02/18/03 | CM73                         | F                   | 157                | 161    | 231                | 255    | 181                | 189 | 273                | 313 |
|            | DP11                      | 02/18/03 | CM73                         | F                   | 157                | 161    | 231                | 255    | 181                | 189 | 273                | 313 |
|            | DP15                      | 02/18/03 | CM73                         | F                   | 157                | 161    | 231                | 255    | 181                | 189 | 273                | 313 |
|            | DP20                      | 02/19/03 | CM73                         | F                   | 157                | 161    | 231                | 255    | 181                | 189 | 273                | 313 |
|            | DP108                     | 08/17/03 | CM73                         | F                   | 157                | 161    | 231                | 255    | 181                | 189 | 273                | 313 |
| ID52       | DP77                      | 03/31/03 | CM75                         | F                   | 153                | 153    | 235                | 239    | 177                | 185 | 301                | 305 |
|            | DP095                     | 07/29/03 | CM75                         | F                   | 153                | 153    | 235                | 239    | 177                | 185 | 301                | 305 |
|            | DP097                     | 07/29/03 | CM75                         | F                   | 153                | 153    | 235                | 239    | 177                | 185 | 301                | 305 |
| ID53       | DP096                     | 07/29/03 | CM77                         | F                   | 153                | 173    | 191                | 227    | 177                | 185 | 301                | 309 |
| ID54       | DP093                     | 07/29/03 | CM77                         | F                   | 169                | 173    | 223                | 227    | 169                | 185 | 301                | 309 |
| ID55       | DP136                     | 11/08/03 | CM79                         | F                   | 137                | 153    | 227                | 231    | 181                | 189 | 289                | 305 |
| ID56       | DP143                     | 11/11/03 | CM79                         | F                   | 153                | 173    | 215                | 223    | 177                | 185 | 301                | 305 |
|            | DP150                     | 11/11/03 | CM79                         | F                   | 153                | 173    | 215                | 223    | 177                | 185 | 301                | 305 |
| ID57       | DP141                     | 11/11/03 | CM79                         | F                   | 165                | 173    | 223                | 231    | 181                | 185 | 277                | 305 |
|            | DP145                     | 11/11/03 | CM79                         | F                   | 165                | 173    | 223                | 231    | 181                | 185 | 277                | 305 |
|            | DP146                     | 11/11/03 | CM79                         | F                   | 165                | 173    | 223                | 231    | 181                | 185 | 277                | 305 |
|            | DP148                     | 11/11/03 | CM79                         | F                   | 165                | 173    | 223                | 231    | 181                | 185 | 277                | 305 |
|            | DP149                     | 11/11/03 | CM79                         | F                   | 165                | 173    | 223                | 231    | 181                | 185 | 277                | 305 |

**Table S4.** Genetic identification of uninfected chimpanzees at five field sites (continued).

| Individual | Fecal Sample <sup>1</sup> | Date     | mtDNA haplotype <sup>2</sup> | Gender <sup>3</sup> | Locus <sup>4</sup><br>D18S536 |     | Locus <sup>4</sup><br>D4S243 |     | Locus <sup>4</sup><br>D10S676 |     | Locus <sup>4</sup><br>D9S922 |     |
|------------|---------------------------|----------|------------------------------|---------------------|-------------------------------|-----|------------------------------|-----|-------------------------------|-----|------------------------------|-----|
| ID58       | DP152                     | 11/13/03 | CM80                         | M                   | 153                           | 165 | 227                          | 231 | 185                           | 185 | 309                          | 313 |
|            | DP153                     | 11/13/03 | CM80                         | M                   | 153                           | 165 | 227                          | 231 | 185                           | 185 | 309                          | 313 |
|            | DP165                     | 11/17/03 | CM80                         | M                   | 153                           | 165 | 227                          | 231 | 185                           | 185 | 309                          | 313 |
| ID59       | DP155                     | 11/14/03 | CM81                         | F                   | 165                           | 169 | 199                          | 227 | 181                           | 181 | 293                          | 297 |
| ID60       | DP157                     | 11/14/03 | CM81                         | F                   | 169                           | 173 | 223                          | 227 | 181                           | 185 | 285                          | 285 |
|            | DP158                     | 11/14/03 | CM81                         | F                   | 169                           | 173 | 223                          | 227 | 181                           | 185 | 285                          | 285 |
| ID61       | EK508                     | 07/13/04 | CM4                          | F                   | 157                           | 169 | 227                          | 247 | 181                           | 189 | 293                          | 305 |
| ID62       | EK509                     | 07/13/04 | CM4                          | F                   | 169                           | 173 | 227                          | 227 | 177                           | 181 | 301                          | 305 |
| ID63       | EK513                     | 08/09/04 | CM7                          | F                   | 145                           | 173 | 223                          | 227 | 177                           | 185 | 297                          | 309 |
| ID64       | EK522                     | 08/18/04 | CM7                          | F                   | 165                           | 173 | 227                          | 231 | 177                           | 177 | 293                          | 297 |
| ID65       | EK501                     | 07/08/04 | CM20                         | F                   | 145                           | 157 | 195                          | 195 | 177                           | 189 | 297                          | 297 |
| ID66       | EK521                     | 08/18/04 | CM24                         | F                   | 145                           | 157 | 191                          | 243 | 185                           | 185 | 273                          | 305 |
| ID67       | EK511                     | 08/08/04 | CM42                         | F                   | 169                           | 173 | 191                          | 195 | 177                           | 185 | 301                          | 305 |
| ID68       | EK510                     | 07/13/04 | CM61                         | F                   | 169                           | 173 | 187                          | 195 | 181                           | 185 | 297                          | 297 |
|            | EK503                     | 07/11/04 | CM5                          | M                   | 141                           | 157 | 195                          | 227 | 177                           | 181 | 293                          | 309 |
| ID69       | EK517                     | 08/10/04 | CM5                          | M                   | 141                           | 157 | 195                          | 227 | 177                           | 181 | 293                          | 309 |
|            | EK512                     | 08/08/04 | CM65                         | F                   | 169                           | 173 | 191                          | 223 | 177                           | 185 | 305                          | 309 |
| ID70       | EK518                     | 08/10/04 | CM66                         | F                   | 169                           | 173 | 195                          | 227 | 177                           | 177 | 289                          | 293 |
| ID71       | EK518                     | 08/10/04 | CM66                         | F                   | 169                           | 173 | 195                          | 227 | 177                           | 177 | 289                          | 293 |
| ID72       | BB241                     | 04/13/03 | CM4                          | F                   | 157                           | 169 | 191                          | 227 | 169                           | 197 | 305                          | 313 |
| ID73       | BB79                      | 06/06/03 | CM18                         | F                   | 157                           | 173 | 227                          | 231 | 177                           | 185 | 297                          | 309 |
| ID74       | BB104                     | 06/07/03 | CM18                         | F                   | 145                           | 157 | 231                          | 255 | 177                           | 185 | 297                          | 297 |
| ID75       | BB106                     | 06/08/03 | CM30                         | F                   | 145                           | 173 | 195                          | 215 | 177                           | 185 | 293                          | 297 |
| ID76       | BB235                     | 04/13/03 | CM39                         | F                   | 145                           | 173 | 195                          | 207 | 181                           | 185 | 289                          | 289 |
| ID77       | BB236                     | 04/13/03 | CM40                         | F                   | 157                           | 173 | 227                          | 227 | 177                           | 189 | 305                          | 305 |
| ID78       | BB74                      | 06/06/03 | CM19                         | F                   | 157                           | 173 | 211                          | 227 | 173                           | 181 | 285                          | 297 |
| ID79       | BB230                     | 04/10/03 | CM19                         | M                   | 157                           | 169 | 187                          | 223 | 169                           | 169 | 285                          | 289 |
| ID80       | BB94                      | 06/07/03 | CM19                         | F                   | 157                           | 165 | 227                          | 235 | 181                           | 185 | 297                          | 301 |
| ID81       | BB102                     | 06/07/03 | CM19                         | F                   | 165                           | 173 | 223                          | 227 | 185                           | 189 | 293                          | 301 |
| ID82       | BB239                     | 04/13/03 | CM20                         | M                   | 145                           | 173 | 195                          | 235 | 177                           | 185 | 293                          | 305 |
| ID83       | BB76                      | 06/06/03 | CM20                         | F                   | 141                           | 173 | 227                          | 231 | 181                           | 189 | 281                          | 297 |
| ID84       | BB77                      | 06/06/03 | CM21                         | F                   | 157                           | 173 | 187                          | 227 | 181                           | 189 | 305                          | 309 |
| ID85       | BB101                     | 06/07/03 | CM22                         | F                   | 141                           | 145 | 187                          | 195 | 177                           | 185 | 289                          | 301 |
| ID86       | BB88                      | 06/07/03 | CM26                         | F                   | 141                           | 173 | 211                          | 227 | 181                           | 185 | 293                          | 309 |
|            | BB95                      | 06/07/03 | CM26                         | F                   | 141                           | 173 | 211                          | 227 | 181                           | 185 | 293                          | 309 |
| ID87       | BB237                     | 04/13/03 | CM27                         | M                   | 165                           | 173 | 227                          | 231 | 169                           | 177 | 281                          | 309 |
|            | BB240                     | 04/13/03 | CM27                         | M                   | 165                           | 173 | 227                          | 231 | 169                           | 177 | 281                          | 309 |
|            | BB89                      | 06/07/03 | CM27                         | M                   | 165                           | 173 | 227                          | 231 | 169                           | 177 | 281                          | 309 |
| ID88       | BB100                     | 06/07/03 | CM28                         | F                   | 145                           | 157 | 223                          | 239 | 169                           | 177 | 289                          | 297 |
|            | BB99                      | 06/07/03 | CM28                         | F                   | 145                           | 157 | 223                          | 239 | 169                           | 177 | 289                          | 297 |
| ID89       | BB229                     | 04/10/03 | CM29                         | F                   | 145                           | 173 | 195                          | 195 | 177                           | 185 | 293                          | 297 |
|            | BB234                     | 04/13/03 | CM29                         | F                   | 145                           | 173 | 195                          | 195 | 177                           | 185 | 293                          | 297 |
|            | BB238                     | 04/13/03 | CM29                         | F                   | 145                           | 173 | 195                          | 195 | 177                           | 185 | 293                          | 297 |
|            | BB93                      | 06/07/03 | CM29                         | F                   | 145                           | 173 | 195                          | 195 | 177                           | 185 | 293                          | 297 |
| ID90       | MB135                     | 11/08/03 | CM5                          | M                   | 141                           | 173 | 191                          | 231 | 181                           | 181 | 313                          | 313 |
|            | MB140                     | 11/08/03 | CM9                          | M                   | 165                           | 173 | 227                          | 231 | 169                           | 177 | 281                          | 309 |
| ID91       | MB97                      | 06/12/03 | CM12                         | M                   | 153                           | 169 | 195                          | 227 | 189                           | 189 | 273                          | 293 |
| ID92       | MB318                     | 12/13/03 | CM33                         | F                   | 165                           | 169 | 195                          | 227 | 181                           | 189 | 301                          | 305 |
| ID93       | MB319                     | 12/13/03 | CM33                         | F                   | 165                           | 169 | 227                          | 247 | 177                           | 181 | 297                          | 305 |
|            | MB320                     | 12/13/03 | CM33                         | F                   | 165                           | 169 | 227                          | 247 | 177                           | 181 | 297                          | 305 |
| ID94       | MB138                     | 11/08/03 | CM33                         | F                   | 145                           | 173 | 195                          | 235 | 177                           | 185 | 293                          | 305 |
|            | MB139                     | 11/08/03 | CM33                         | F                   | 145                           | 173 | 195                          | 235 | 177                           | 185 | 293                          | 305 |
| ID95       | MB250                     | 11/08/03 | CM33                         | M                   | 149                           | 153 | 195                          | 227 | 177                           | 181 | 309                          | 313 |
| ID96       | MB324                     | 12/15/03 | CM34                         | F                   | 165                           | 169 | 227                          | 247 | 169                           | 185 | 297                          | 297 |
| ID97       | MB190                     | 03/10/03 | CM38                         | M                   | 161                           | 169 | 227                          | 227 | 189                           | 193 | 305                          | 305 |
| ID98       | MB246                     | 04/18/03 | CM42                         | M                   | 141                           | 157 | 203                          | 235 | 185                           | 185 | 289                          | 297 |
|            | MB247                     | 04/18/03 | CM42                         | M                   | 141                           | 157 | 203                          | 235 | 185                           | 185 | 289                          | 297 |
| ID99       | MB315                     | 12/11/03 | CM43                         | F                   | 153                           | 165 | 187                          | 227 | 177                           | 185 | 293                          | 309 |
|            | MB316                     | 12/11/03 | CM43                         | F                   | 153                           | 165 | 187                          | 227 | 177                           | 185 | 293                          | 309 |
| ID100      | MB323                     | 12/15/03 | CM45                         | M                   | 145                           | 173 | 227                          | 227 | 169                           | 185 | 297                          | 305 |
| ID101      | LB307                     | 01/10/04 | CM13                         | M                   | 149                           | 153 | 227                          | 247 | 177                           | 181 | 301                          | 305 |
|            | LB308                     | 01/10/04 | CM13                         | M                   | 149                           | 153 | 227                          | 247 | 177                           | 181 | 301                          | 305 |
| ID102      | LB311                     | 01/10/04 | CM33                         | F                   | 149                           | 153 | 227                          | 239 | 177                           | 181 | 293                          | 293 |
|            | LB312                     | 01/10/04 | CM33                         | F                   | 149                           | 153 | 227                          | 239 | 177                           | 181 | 293                          | 293 |
|            | LB313                     | 01/10/04 | CM33                         | F                   | 149                           | 153 | 227                          | 239 | 177                           | 181 | 293                          | 293 |
| ID103      | LB176                     | 03/04/03 | CM34                         | M                   | 157                           | 161 | 219                          | 231 | 177                           | 177 | 285                          | 297 |
|            | LB309                     | 01/10/04 | CM38                         | M                   | 153                           | 157 | 195                          | 227 | 185                           | 189 | 297                          | 305 |
| ID104      | LB204                     | 06/07/03 | CM23                         | F                   | 145                           | 149 | 187                          | 187 | 181                           | 205 | 273                          | 273 |
| ID105      | LB205                     | 06/07/03 | CM23                         | M                   | 157                           | 161 | 191                          | 227 | 169                           | 177 | 293                          | 305 |
|            | LB208                     | 06/07/03 | CM23                         | M                   | 157                           | 161 | 191                          | 227 | 169                           | 177 | 293                          | 305 |
| ID106      | LB174                     | 03/04/03 | CM28                         | M                   | 157                           | 173 | 191                          | 243 | 177                           | 189 | 285                          | 289 |
|            | LB175                     | 03/04/03 | CM28                         | M                   | 157                           | 173 | 191                          | 243 | 177                           | 189 | 285                          | 289 |

<sup>1</sup>Fecal samples collected from five different field sites (DP, EK, BB, MB and LB) were subjected to mtDNA, gender and microsatellite analyses. Only data from uninfected chimpanzees are shown. The microsatellite genotype of SIVcpzPtt infected chimpanzees from these same five sites is shown in table S3.

<sup>2</sup>mtDNA haplotype as listed in table S2.

<sup>3</sup>M, male; F, female.

<sup>4</sup>Microsatellite loci were amplified from fecal DNA; two alleles per locus are shown; homozygous loci were amplified a minimum of seven times to exclude allelic dropout.



## References

- S1. E. S. Lader, United States Patent Application 20010016312 (2001).
- S2. M. L. Santiago *et al.*, *J. Virol.* **77**, 7545 (2003).
- S3. M. L. Santiago *et al.*, *J. Virol.* **77**, 2233 (2003).
- S4. M. L. Santiago *et al.*, *J. Virol.* **79**, 12515 (2005).
- S5. E. Nerrienet *et al.*, *J. Virol.* **79**, 1312 (2005).
- S6. J. D. Thompson *et al.*, *NAR* **22**, 4673 (1994).
- S7. F. Gao *et al.*, *Nature* **397**, 436 (1999).
- S8. F. Simon *et al.*, *Nature Medicine* **4**, 1032 (1998).
- S9. J. P. Huelsenbeck, F. Ronquist, *Bioinformatics* **17**, 754 (2001).
- S10. K. M. Sullivan *et al.*, *BioTechniques* **15**, 637 (1993).
